# Supplementary material for: Enhancement of LncRNA-HFRL expression induces cardiomyocyte inflammation, proliferation, and fibrosis via the sequestering of miR-149-5p-mediated collagen 22A inhibition
Source: PubMed Central journal article supplement — Ann Transl Med. 2022 May;10(9):523. doi: 10.21037/atm-22-1756 (PMC9347043; doi:10.21037/atm-22-1756), 2022-05
Supplement: atm-10-09-523-dss.pdf [file atm-10-09-523-dss.pdf]

## Data Sharing Statement

|                     |                                                                                                                                                        |                                                                                                                  |
|---------------------|--------------------------------------------------------------------------------------------------------------------------------------------------------|------------------------------------------------------------------------------------------------------------------|
| <b>Article Info</b> | <a href="https://dx.doi.org/10.21037/atm-22-1756">https://dx.doi.org/10.21037/atm-22-1756</a>                                                          |                                                                                                                  |
| <b>Item</b>         | <b>Question</b>                                                                                                                                        | <b>Authors' Response<br/>(place "-" if not applicable)</b>                                                       |
| 1                   | Would you like to share data collected for your study to others?                                                                                       | Yes.                                                                                                             |
| 2                   | If not, would you like to share the reason for your decision?                                                                                          | -                                                                                                                |
| 3                   | What data in particular will be shared?                                                                                                                | The methodology in particular in our study can be shared.                                                        |
| 4                   | Any other documents will be shared?<br>Such as study protocol, statistical analysis plan, informed consent form, clinical study report, analytic code. | Statistical analysis plan and animal study report will also be shared if requested.                              |
| 5                   | When will data availability begin?                                                                                                                     | From the publication date.                                                                                       |
| 6                   | When will data availability end?                                                                                                                       | Two years within the publication date.                                                                           |
| 7                   | To whom will you share the data?                                                                                                                       | The cardiac surgeons who are interested in studies of heart failure.                                             |
| 8                   | For what type of analysis or purpose?                                                                                                                  | For analysis to identify and validate the lncRNA-HFRL network to regulate the heart failure in mice.             |
| 9                   | How or where can the data/documents be obtained?                                                                                                       | Requirement via emails below to share data:<br>jimei_1965@outlook.com.                                           |
| 10                  | Any other restrictions?                                                                                                                                | We may balance the potential benefits and risks for each request and then provide the data that could be shared. |
